# Supplementary material for: Internet Access and Hypertension Management Among the Elderly Population: A Nationally Representative Cross-Sectional Survey in China
Source: PubMed Central journal article supplement (PMC6374727; doi:10.2196/11280), 2019-01-31
Supplement: jmir_v21i1e11280_app1.pdf [file jmir_v21i1e11280_app1.pdf]

Multimedia Appendix 1 Comparison of hypertension management outcomes between response group and non-response group

| □                            | Response<br>(n = 5135) | Non-response<br>(n = 125) | P-value <sup>a</sup> |
|------------------------------|------------------------|---------------------------|----------------------|
| Proportion of Awareness (SD) | 57.21 (6.92)           | 57.72 (4.47)              | 0.909                |
| Proportion of Treatment (SD) | 49.15 (6.98)           | 44.00 (4.45)              | 0.255                |
| Proportion of Control (SD)   | 20.29 (5.61)           | 24.00 (3.83)              | 0.309                |

<sup>a</sup>T-test was performed between the response group and non-response group.
